# Supplementary material
Source: MDPI journal article supplement (https://www.mdpi.com/2075-163X/10/6/511)
Supplement: s1 [file s1]

## Sheet: Sheet1
Formation	Buah	Buah	Buah	Buah	Buah	Buah	Buah	Buah	Buah	Buah	Buah	Buah	Buah	Buah	Buah	Buah	Buah	Shuram	Shuram	Shuram	Shuram	Shuram	Shuram	Shuram	Shuram	Shuram	Shuram	Shuram	Shuram	Shuram	Shuram	Shuram	Shuram	Shuram	Shuram	Shuram	Shuram	Shuram	Shuram	Shuram	Shuram	Shuram	Shuram	Shuram	Shuram	Shuram	Shuram	Shuram	Shuram
File	1743	1746	1747	1750	1751	1754	1755	1758	1759	1766	1771	1774	1775	1778	1779	1782	1783	1786	1787	1793	1800	1803	1804	1807	1808	1811	1812	1815	1816	1822	1827	1830	1831	1834	1835	1838	1839	1842	1848	1857	1858	1861	1862	1865	1866	1869	1870	1875	1881
Code	BAK1	BAJ1	BAJ2	BAK2	BAK3	BAK4	BAK5	BAJ3	BAK6	BAK7	BAK8	BAJ4	BAK9	BAJ4B	BAJ5	BAK10	BAJ6	BAK11	BAK12	BAJ7	BAK13	BAJ8	BAK14	BAK15	BAK16	BAK17	BAK18	BAJ9	BAK19	BAK20	BAK21	BAK22	BAK23	BAK24	BAK25	BAK26	BAK27	BK44A (SMALL)	BK42A (SMALL)	BK41	BK31	BK30	BK29	BK28	BK27	BK26	BK25	BK24	BK23
Depth(m)	1348	1330	1314	1299	1284	1270	1255	1240	1223	1204	1185	1175	1168	1165	1152	1141	1127	1125	1124.5	1124	1105	1088	1084	1030	1050	1029	1010	1001	996	978	960	942	923	905	886	868	850	956	941	923	748	730	712	694	683	665	647	629	613
Lithology	dolostone	stromatolitic dolostone	stromatolitic dolostone	dolostone	dolostone	dolostone	dolostone	stromatolitic dolostone	dolostone	limestone	limestone	laminated limestone	limestone	limestone	limestone	limestone	limestone	limestone	limestone	limestone	limestone	limestone	limestone	calcareous siltstone	mudy limestone	mudy limestone	sandy limestone	limestone	sandy limestone	mudy limestone	mudy limestone	mudy limestone	calcareous siltstone	mudy limestone	mudy limestone	mudy limestone	sandy limestone	shale	shale	shale	shale	shale	shale	shale	shale	shale	shale	shale	shale
Major elements	wt.%
Si	1.7371	8.3563	2.1483	1.5094	2.1291	1.5899	1.5911	2.4408	2.1782	3.2826	1.5001	1.8535	2.5194	2.9382	2.5076	1.9571	1.4929	1.8588	2.8368	3.1227	2.0413	4.3236	3.3473	18.1165	5.539	7.8712	9.3835	5.0914	9.5787	6.3991	5.3164	5.499	11.1076	4.982	5.9576	5.3682	7.787	26.5834	26.2559	24.135	23.4405	24.7016	23.9653	23.8602	25.0553	24.7265	21.6379	22.4627	23.6266
Si Err	0.0248	0.0623	0.0288	0.0223	0.0286	0.0235	0.0231	0.0316	0.029	0.0268	0.0224	0.0186	0.0214	0.0257	0.0222	0.0201	0.0186	0.0188	0.0247	0.0296	0.0199	0.0327	0.025	0.1002	0.0333	0.0389	0.0415	0.0317	0.0505	0.0454	0.0373	0.0341	0.0728	0.0305	0.0332	0.0304	0.0542	0.156	0.1531	0.1403	0.1492	0.1534	0.1571	0.1539	0.158	0.1549	0.1449	0.1485	0.1587
Al	0.0018	0.138	0.2423		0.0293			0.1923		0.4519				0.411	0.0325				0.2156	0.6133	0.0328	0.5325	0.235	3.5155	0.4354	1.2758	1.579	0.7539	2.7434	1.4574	1.192	1.3756	1.7808	0.5835	0.7639	0.5987	1.0365	7.0036	7.1962	7.3819	7.7225	7.7423	7.2337	7.6764	7.2047	7.0482	7.4892	7.9617	7.9329
Al Err	0.0369	0.0379	0.0419		0.0384			0.041		0.048				0.0473	0.0418				0.044	0.0508	0.0426	0.0489	0.0445	0.0752	0.0461	0.0563	0.0594	0.052	0.0733	0.0547	0.0545	0.0604	0.0492	0.0493	0.0511	0.0493	0.0548	0.0982	0.0997	0.1037	0.1101	0.1079	0.1052	0.1095	0.1037	0.1024	0.1107	0.1128	0.1118
Ti		0.0145	0.015		0.0081	0.0051		0.011		0.0288		0.0154	0.0163	0.0269	0.0148	0.009	0.0113	0.0127	0.0258	0.0355	0.0128	0.0403	0.0256	0.2165	0.0367	0.0548	0.0796	0.0459	0.0774	0.0389	0.0261	0.0395	0.1275	0.0349	0.0435	0.0458	0.0692	0.3733	0.395	0.2837	0.3909	0.3744	0.3571	0.38	0.4002	0.4016	0.3999	0.3988	0.3631
Ti Err		0.0013	0.0013		0.0012	0.0012		0.0012		0.0018		0.0016	0.0016	0.0018	0.0016	0.0015	0.0015	0.0016	0.0018	0.0019	0.0016	0.002	0.0018	0.0035	0.0019	0.0022	0.0025	0.0021	0.0024	0.0016	0.0016	0.002	0.0019	0.0019	0.0021	0.0022	0.0023	0.0042	0.0045	0.0037	0.0045	0.0043	0.0039	0.0043	0.0045	0.0045	0.0045	0.0044	0.0039
Fe	0.4808	0.3611	0.6544	0.5568	0.5048	0.4598	0.501	0.5415	0.547	0.6906	0.594	0.5284	0.4812	0.5488	0.6205	0.4294	0.5502	0.4905	1.0271	1.054	0.4832	0.5773	0.7154	2.043	0.6866	0.6058	0.6166	0.8164	0.6986	0.9414	0.6982	0.5029	1.2207	0.5492	0.4087	0.2163	0.1621	3.9203	4.1278	3.9389	4.1023	4.4985	4.6764	4.4282	4.5779	4.1716	4.4189	4.7007	4.7369
Fe Err	0.0271	0.0305	0.0271	0.0259	0.0279	0.0283	0.027	0.0277	0.0281	0.0276	0.0255	0.0277	0.0283	0.0282	0.0271	0.0283	0.0281	0.0283	0.0262	0.0285	0.0289	0.0313	0.0281	0.0314	0.0299	0.0317	0.0324	0.0306	0.0324	0.0254	0.0281	0.0326	0.0206	0.0309	0.0326	0.0338	0.0368	0.0349	0.035	0.0306	0.0349	0.0346	0.032	0.0338	0.0354	0.0352	0.0331	0.0338	0.0318
Ca	21.1632	18.7643	21.7568	21.0329	22.1171	22.8571	22.1043	21.2937	22.6663	34.1497	20.2881	36.9748	36.1629	34.3046	35.2159	35.1246	33.4853	36.833	33.5349	31.4246	36.6138	30.9226	34.7001	12.2936	30.9309	28.686	27.5158	31.8907	24.7339	22.9689	27.7269	30.8712	9.935	32.6165	31.2704	32.6864	23.0914	2.1663	2.6488	4.8078	3.5182	2.7503	1.5234	2.5841	2.0508	2.3998	3.6762	2.9881	1.0878
Ca Err	0.1582	0.1492	0.1687	0.1546	0.1704	0.1756	0.1649	0.1665	0.1772	0.2755	0.1497	0.2842	0.2769	0.2762	0.2689	0.2668	0.2598	0.2831	0.2571	0.2586	0.2848	0.2491	0.2692	0.1137	0.2443	0.2329	0.2288	0.2551	0.2074	0.1701	0.2122	0.2503	0.0679	0.2609	0.2513	0.2623	0.1933	0.0298	0.0345	0.0544	0.0429	0.0355	0.0223	0.0335	0.028	0.0313	0.0433	0.0368	0.0185
Mg	13.2305	11.1176	16.0673	13.8435	15.0506	15.8285	15.261	13.0444	14.7743	1.0739	11.3934	1.3292	1.4108	1.1126	0.7883	0.9327	0.4227	1.1139	1.6813	1.1286	1.5038	0.5127	1.3898	0.2358	1.1342	0.9655	0.8879	1.0432	0.5412		0.2742	0.9541		1.1518	1.0903	1.0971		0.7821	0.9315	1.144	0.9307	0.9712	0.6256	0.6931	0.7184	0.925	0.5171	0.6263	0.8359
Mg Err	0.9127	0.8536	1.0548	0.9304	1.016	1.0595	1.0032	0.9257	1.0135	0.2934	0.8213	0.3138	0.3158	0.2948	0.2712	0.2824	0.2548	0.3007	0.3314	0.3018	0.3269	0.2495	0.312	0.1543	0.2871	0.2644	0.2531	0.2853	0.2255		0.2145	0.2797		0.2926	0.2843	0.288		0.1796	0.1981	0.2283	0.215	0.2127	0.1792	0.1883	0.1846	0.2072	0.1799	0.187	0.2045
K	0.039		0.2349		0.1107	0.0175	0.0154	0.271	0.1776	0.4762	0.0131	0.1443	0.0992	0.6029	0.1116	0.1442	0.112	0.0908	0.1374	0.6009	0.191	0.2755	0.1528	0.9893	0.1339	0.2656	0.3297	0.1779	0.4073	0.2299	0.2113	0.1931	0.1852	0.2213	0.1953	0.1816	0.2116	2.7132	2.5777	2.369	2.7682	2.7112	2.208	2.5685	2.1572	2.2801	2.6091	2.5865	2.7642
K Err	0.0063		0.008		0.007	0.0062	0.0061	0.0083	0.0075	0.0078	0.0061	0.0055	0.0054	0.0083	0.0055	0.0057	0.0058	0.0052	0.0059	0.0091	0.0058	0.0074	0.0059	0.0162	0.0064	0.0077	0.0084	0.0066	0.0094	0.0075	0.007	0.0069	0.0074	0.0068	0.0068	0.0065	0.0083	0.0332	0.0321	0.0294	0.033	0.0329	0.0286	0.0317	0.0288	0.0294	0.0311	0.0312	0.0331
Na	0.4114	0.367	0.3398	0.3674	0.3325	0.3297	0.3404	0.3788	0.3521	0.2366	0.4283	0.1719	0.18	0.2349	0.2256	0.2406	0.2543	0.1666	0.1841	0.2875	0.1814	0.2504	0.1864	0.4264	0.2217	0.2659	0.2473	0.185	0.2839	0.4052	0.3293	0.2314	0.6561	0.2366	0.2115	0.202	0.3679	0.4217	0.4096	0.3942	0.4255	0.3573	0.4339	0.4211	0.4015	0.4471	0.4423	0.4334	0.4306
Na Err	0.0313	0.0345	0.0331	0.0318	0.0335	0.0337	0.0326	0.0328	0.0335	0.0378	0.0307	0.0382	0.0381	0.0373	0.0372	0.0366	0.0372	0.0385	0.0378	0.0371	0.0383	0.0382	0.0383	0.037	0.0384	0.0382	0.0393	0.0395	0.0386	0.0323	0.035	0.0391	0.0241	0.0383	0.0391	0.0393	0.0374	0.0389	0.0392	0.039	0.0383	0.0401	0.0375	0.0385	0.0392	0.0378	0.0372	0.0375	0.0374
Mn	0.0252	0.0251	0.0292	0.0262	0.0293	0.025	0.0306	0.0228	0.0292	0.0221	0.0159	0.0322	0.0465	0.0466	0.034	0.0889	0.046	0.0297	0.0582	0.0916	0.1029	0.1631	0.0809	0.0946	0.1107	0.1445	0.1076	0.1676	0.1091	0.1264	0.1526	0.1761	0.1316	0.1455	0.1994	0.2333	0.2904	0.0396	0.0534	0.0742	0.0809	0.0686	0.0714	0.0741	0.0712	0.0755	0.0963	0.0844	0.0637
Mn Err	0.0017	0.0018	0.002	0.0019	0.002	0.0018	0.0021	0.0017	0.002	0.0018	0.0011	0.0024	0.0031	0.0029	0.0025	0.0048	0.0031	0.0023	0.0036	0.0049	0.0053	0.0072	0.0045	0.0046	0.0055	0.0068	0.0053	0.0076	0.0053	0.006	0.007	0.0078	0.0058	0.0068	0.0085	0.0096	0.0116	0.0028	0.0033	0.004	0.0043	0.0039	0.0039	0.004	0.0039	0.0041	0.0048	0.0044	0.0037
P																								0.0894		0.0768	0.0542	0.0843	0.0449					0.0199			0.0193	0.0506	0.0627	0.0598	0.0518	0.0503	0.0415	0.0447	0.0687	0.0529	0.0454	0.0462	0.0275
P Err																								0.013		0.0216	0.0201	0.0242	0.0179					0.022			0.0163	0.0074	0.0083	0.0086	0.0079	0.0076	0.0066	0.0072	0.0086	0.0076	0.0075	0.0073	0.0056
Trace elements	ppm
S		0.0149	0.0273		0.0199	0.0124	0.0247	0.0814	0.0178	0.0495	0.0259	0.0444	0.0235	0.0735	0.0254	0.0338	0.03	0.0136	0.0588	0.1315	0.0534	0.1331	0.068	0.0422	0.0123	0.0462	0.132	0.0704	0.0289	0.0296	0.0788	0.0545	0.013	0.0473	0.0282	0.0653	0.0664	0.1005	0.0807	0.0775	0.0953	0.0814	0.0739	0.0981	0.0978	0.072	0.0711	0.0876	0.1057
S Err		0.0045	0.0046		0.0045	0.0045	0.0045	0.0053	0.0045	0.0052	0.0044	0.0052	0.0049	0.0055	0.0049	0.0049	0.005	0.0048	0.0053	0.0062	0.0053	0.0063	0.0054	0.0051	0.0048	0.0053	0.0064	0.0056	0.005	0.0044	0.0053	0.0054	0.0035	0.0053	0.0051	0.0055	0.0055	0.0063	0.006	0.0058	0.0061	0.0059	0.0057	0.0062	0.0062	0.0057	0.0056	0.0059	0.0063
V	0.0067	0.0097	0.007	0.0061	0.0084	0.0089	0.0081	0.0074	0.0086	0.0038	0.006	0.0039	0.0043	0.004	0.0046	0.0035	0.0038	0.004	0.0047	0.0052	0.0044	0.0046	0.0049	0.0044	0.0056	0.0058	0.005	0.0052	0.0075	0.0016	0.0042	0.0059		0.0061	0.006	0.0051	0.0045	0.0115	0.013	0.0103	0.0103	0.0133	0.0112	0.0136	0.0143	0.0093	0.0107	0.0116	0.0115
V Err	0.0004	0.0005	0.0005	0.0004	0.0005	0.0005	0.0005	0.0005	0.0005	0.0004	0.0004	0.0004	0.0004	0.0004	0.0004	0.0004	0.0004	0.0004	0.0004	0.0004	0.0004	0.0004	0.0004	0.0007	0.0005	0.0005	0.0005	0.0005	0.0005	0.0004	0.0004	0.0005		0.0005	0.0005	0.0005	0.0005	0.0011	0.0012	0.0009	0.0011	0.0011	0.0011	0.0011	0.0012	0.0011	0.0011	0.0011	0.0011
Cr	0.0009	0.0046	0.002	0.0011	0.0022	0.0017	0.0012	0.0017	0.0022	0.0011	0.0008	0.0003		0.0008	0.0009			0.0001	0.0006	0.0006			0.0002	0.0052	0.001	0.0009	0.0028	0.0002	0.0024									0.0113	0.0108	0.01	0.0096	0.0103	0.0098	0.0099	0.01	0.0097	0.0075	0.0085	0.0099
Cr Err	0.0002	0.0003	0.0003	0.0003	0.0003	0.0003	0.0003	0.0003	0.0003	0.0003	0.0003	0.0003		0.0003	0.0003			0.0003	0.0002	0.0002			0.0002	0.0002	0.0002	0.0002	0.0002	0.0002	0.0002									0.0003	0.0003	0.0003	0.0002	0.0002	0.0002	0.0002	0.0002	0.0002	0.0002	0.0002	0.0002
Co	0.0002	0.0002	0.0002	0.0001	0.0002	0.0002	0.0002	0.0002	0.0002	0.0002	0.0002	0.0002	0.0002	0.0002	0.0002	0.0002	0.0002	0.0002	0.0003	0.0004	0.0002	0.0003	0.0003	0.0009	0.0003	0.0003	0.0003	0.0004	0.0004	0.0003	0.0003	0.0003	0.0004	0.0003	0.0003	0.0003	0.0003	0.0019	0.002	0.0017	0.002	0.0021	0.0021	0.0021	0.0022	0.002	0.0021	0.0022	0.0022
Co Err	0	0	0	0	0	0	0	0	0	0	0	0	0	0	0	0	0	0	0	0	0	0	0	0	0	0	0	0	0	0	0	0	0	0	0	0	0	0	0	0	0	0	0	0	0	0	0	0	0
Ni	0.004	0.0067	0.0049	0.0041	0.0055	0.0058	0.0048	0.0052	0.0056	0.0054	0.0035	0.0064	0.0063	0.0048	0.006	0.0052	0.0047	0.0067	0.0054	0.0046	0.0061	0.005	0.006	0.0058	0.005	0.005	0.0057	0.0054	0.0054	0.0012	0.0033	0.0057		0.0059	0.0054	0.0059	0.0036	0.0081	0.0082	0.0082	0.0078	0.0079	0.0078	0.0075	0.0083	0.0078	0.0068	0.0066	0.0071
Ni Err	0.0004	0.0004	0.0004	0.0004	0.0004	0.0004	0.0004	0.0004	0.0004	0.0004	0.0004	0.0004	0.0004	0.0004	0.0004	0.0004	0.0004	0.0004	0.0004	0.0004	0.0004	0.0004	0.0004	0.0004	0.0004	0.0004	0.0004	0.0004	0.0004	0.0003	0.0004	0.0004		0.0004	0.0004	0.0004	0.0004	0.0005	0.0005	0.0005	0.0005	0.0005	0.0005	0.0005	0.0005	0.0005	0.0005	0.0005	0.0005
Zn	0.0061	0.0067	0.0062	0.0061	0.0061	0.0062	0.0059	0.0064	0.0059	0.0069	0.0062	0.0067	0.0067	0.0067	0.0067	0.0069	0.007	0.0067	0.0066	0.0067	0.007	0.0068	0.0066	0.0081	0.0066	0.0065	0.0067	0.0067	0.0066	0.0067	0.0067	0.0064	0.0072	0.0067	0.0067	0.0065	0.007	0.0116	0.0119	0.0109	0.0111	0.0108	0.0098	0.011	0.0113	0.012	0.01	0.0101	0.0099
Zn Err	0	0.0001	0	0	0	0	0	0	0	0	0	0.0001	0	0	0	0	0	0	0.0001	0	0	0	0	0.0002	0	0	0	0	0	0.0001	0	0	0.0001	0	0	0	0	0.0004	0.0004	0.0003	0.0003	0.0003	0.0003	0.0003	0.0004	0.0004	0.0003	0.0003	0.0003
Ti		0.0373	0.0557	0.0309	0.0539	0.0206	0.0372	0.0276	0.0227	0.0319		0.0131	0.0397	0.0314	0.0202	0.0287	0.0171	0.0306	0.0492	0.0328	0.0218	0.071	0.0326	0.2726	0.019	0.0838	0.1002	0.0684	0.1023	0.0939	0.0588	0.07	0.2664	0.0355	0.0477	0.0519	0.0729	0.4427	0.4021	0.3476	0.5147	0.5374	0.499	0.4851	0.4918	0.5291	0.4993	0.5253	0.508
Ti Err		0.0025	0.0035	0.0022	0.0034	0.0017	0.0027	0.0021	0.0018	0.0022		0.001	0.0026	0.0021	0.0014	0.0019	0.0013	0.0021	0.003	0.0021	0.0015	0.0042	0.0021	0.0109	0.0014	0.0048	0.0053	0.004	0.0055	0.005	0.0037	0.0042	0.0104	0.0023	0.003	0.0031	0.0042	0.0159	0.0147	0.0131	0.0184	0.0191	0.0177	0.0173	0.0175	0.0186	0.0177	0.0185	0.018
Cu		0.0015	0.0009	0.0005	0.0009	0.0009	0.0007	0.0009	0.0003	0.0012		0.0004	0.0005	0.0017	0.0016	0.002	0.0017	0.0008	0.0009	0.0018	0.0006	0.0022	0.0014	0.0016	0.0012	0.0021	0.0013	0.0017	0.0017	0.0024	0.0011	0.0032	0.0039	0.0015	0.0013	0.0022	0.0012	0.0019	0.002	0.0021	0.0029	0.0025	0.0093	0.0019	0.0025	0.0018	0.002	0.0027	0.0053
Cu Err		0.0006	0.0006	0.0006	0.0006	0.0006	0.0006	0.0006	0.0006	0.0007		0.0007	0.0007	0.0007	0.0007	0.0008	0.0007	0.0007	0.0007	0.0007	0.0007	0.0007	0.0007	0.0007	0.0007	0.0008	0.0007	0.0007	0.0007	0.0008	0.0007	0.0008	0.0008	0.0007	0.0007	0.0008	0.0007	0.0007	0.0007	0.0007	0.0007	0.0007	0.001	0.0007	0.0007	0.0007	0.0007	0.0007	0.0008
As	0.0001	0.0001	0.0002	0.0001	0.0002	0.0002	0.0002	0.0001	0.0001	0.0001	0.0002	0.0001	0.0002	0.0002	0.0002	0.0002	0.0001	0.0001	0.0002	0.0003	0.0002	0.0003	0.0002	0.0005	0.0002	0.0019	0.0001	0.0013	0.0003	0.0002	0.0002	0.0002	0.0002	0.0007	0.0011	0.0003	0.0002	0.0008	0.0007	0.0007	0.0008	0.0008	0.0009	0.0007	0.0008	0.0009	0.0009	0.001	0.0008
As Err	0	0	0.0001	0	0	0	0	0	0	0	0	0	0	0	0.0001	0.0001	0	0	0	0	0	0	0	0.0001	0	0.0005	0	0.0004	0.0001	0	0.0001	0.0001	0	0.0003	0.0004	0.0001	0.0001	0.0001	0.0001	0.0001	0.0002	0.0002	0.0001	0.0001	0.0001	0.0002	0.0001	0.0002	0.0002
Rb		0.0007	0.001	0.0002	0.0011		0.001	0.0017	0.001	0.0011		0.0006		0.0027	0.0012		0.0006	0.0005	0.0011	0.0023	0.0003	0.0022	0.0018	0.0085	0.0008	0.0014	0.0013	0.0013	0.0028	0.0025	0.0009	0.001	0.003	0.0012	0.0008	0.0008	0.002	0.0198	0.0173	0.0159	0.0197	0.0234	0.0168	0.0199	0.0172	0.0196	0.0225	0.0212	0.0227
Rb Err		0.0002	0.0002	0.0002	0.0002		0.0002	0.0002	0.0002	0.0002		0.0003		0.0002	0.0002		0.0003	0.0003	0.0002	0.0002	0.0003	0.0002	0.0002	0	0.0002	0.0002	0.0002	0.0002	0.0002	0.0002	0.0002	0.0002	0.0002	0.0002	0.0002	0.0002	0.0002	0.0003	0.0003	0.0002	0.0003	0.0004	0.0002	0.0003	0.0003	0.0003	0.0004	0.0004	0.0004
Sr		0.0084	0.0091	0.0088	0.0098	0.0118	0.0166	0.0089	0.0139	0.1436		0.1761	0.0608	0.4957	0.2972	0.2071	0.1142	0.1637	0.1412	0.1436	0.1069	0.1448	0.1467	0.0538	0.1468	0.0973	0.0968	0.0851	0.0857	0.0922	0.1022	0.0644	0.0459	0.0862	0.0823	0.1015	0.0916	0.0088	0.0106	0.0156	0.0152	0.0089	0.0106	0.0123	0.0115	0.0121	0.0119	0.0124	0.0091
Sr Err		0.0007	0.0007	0.0007	0.0008	0.0008	0.001	0.0008	0.0009	0.0049		0.006	0.0025	0.0149	0.0097	0.007	0.0042	0.0056	0.0049	0.005	0.0039	0.0049	0.005	0.002	0.005	0.0035	0.0034	0.0032	0.0031	0.0033	0.0037	0.0025	0.0018	0.0032	0.003	0.0036	0.0034	0.0007	0.0008	0.0009	0.001	0.0008	0.0008	0.0009	0.0008	0.0009	0.0009	0.0009	0.0008
Y	0.0013	0.0011	0.0016	0.0015	0.0016	0.0017	0.0016	0.0013	0.0014		0.001	0.0003	0.0012		0.0002	0.0008	0.0014	0.0007	0.0016	0.0019	0.0007	0.0029	0.0021	0.0037	0.0035	0.0032	0.0025	0.0034	0.0026	0.0027	0.0025	0.0029	0.0045	0.0022	0.0026	0.0027	0.0028	0.0021	0.0029	0.0031	0.003	0.0029	0.0037	0.0029	0.0036	0.0038	0.004	0.0037	0.003
Y Err	0	0	0	0	0	0	0	0	0		0	0	0		0	0	0	0	0	0	0	0	0	0.0001	0.0001	0.0001	0	0.0001	0	0	0	0	0.0001	0	0	0	0	0	0	0	0	0	0.0001	0	0.0001	0.0001	0.0001	0.0001	0
Zr	0.0014	0.0065	0.0032	0.0027	0.0029	0.0026	0.0029	0.0037	0.0024	0.0005	0.0007	0.0006	0.0017			0.0002	0.0011	0.0005	0.0013	0.0019	0.0014	0.0009	0.001	0.0212		0.0035	0.0057	0.003	0.0061	0.0042	0.0027	0.0028	0.0348	0.0022	0.0025	0.0024	0.006	0.0151	0.0172	0.0204	0.019	0.0197	0.0202	0.0184	0.0203	0.0249	0.0217	0.0216	0.0171
Zr Err	0.0005	0.0007	0.0006	0.0006	0.0006	0.0006	0.0006	0.0007	0.0006	0.0006	0.0005	0.0006	0.0007			0.0006	0.0007	0.0006	0.0006	0.0007	0.0007	0.0006	0.0006	0.0012		0.0007	0.0008	0.0007	0.0008	0.0007	0.0007	0.0007	0.0015	0.0007	0.0007	0.0007	0.0008	0.001	0.001	0.0011	0.0011	0.0011	0.0011	0.0011	0.0011	0.0013	0.0012	0.0012	0.001
Nb	0.0002	0.0004	0.0003	0.0003	0.0004	0.0004	0.0004	0.0004	0.0003	0.0003	0	0.0003	0.0003	0.0004	0.0005	0.0004	0.0004	0.0004	0.0004	0.0007	0.0004	0.0006	0.0005	0.001	0.0007	0.0009	0.0005	0.0008	0.0007	0.0006	0.0007	0.0006	0.001	0.0006	0.0006	0.0006	0.0006	0.0014	0.0014	0.0013	0.0016	0.0016	0.0015	0.0016	0.0014	0.0017	0.0018	0.0016	0.0016
Nb Err	0.0001	0.0001	0.0001	0.0001	0.0001	0.0001	0.0001	0.0001	0.0001	0.0001	0.0001	0.0001	0.0001	0.0001	0.0001	0.0001	0.0001	0.0001	0.0001	0.0001	0.0001	0.0001	0.0001	0.0001	0.0001	0.0001	0.0001	0.0001	0.0001	0.0001	0.0001	0.0001	0.0001	0.0001	0.0001	0.0001	0.0001	0.0001	0.0001	0.0001	0.0002	0.0002	0.0001	0.0001	0.0001	0.0002	0.0002	0.0001	0.0001
Mo	0.0119										0.0122
Mo Err	0.0003										0.0003
Sn	0.0002	0.0001	0.0001	0.0001	0.0001	0.0001	0.0001	0.0001	0.0001	0.0001	0.0002	0.0001	0.0001	0.0002	0.0001	0.0002	0.0001	0.0001	0.0001	0.0001	0.0001	0.0001	0.0001	0.0001	0.0001	0.0001	0.0001	0.0001	0.0001	0.0001	0.0001	0.0001	0.0001	0.0001	0.0001	0.0001	0.0001	0.0001	0.0001	0.0001	0.0001	0.0001	0.0001	0.0001	0.0001	0.0001	0.0001	0.0001	0.0001
Sn Err	0	0	0	0	0	0	0	0	0	0	0	0	0	0	0	0	0	0	0	0	0	0	0	0	0	0	0	0	0	0	0	0	0	0	0	0	0	0	0	0	0	0	0	0	0	0	0	0	0
Ba	0.2707	0.1351	0.0208	0.1021	0.0395	0.1028	0.0402	0.1343	0.1078		0.2443	0.0588		0.0618	0.0565		0.0599		0.0052	0.1459	0.0236		0.058	0.0091	0.145		0.0331	0.0046	0.0071	0.04			0.094	0.0716	0.0405	0.0651	0.164	0.0088	0.1265	0.1216			0.0494	0.0191		0.0054	0.0955	0.0952
Ba Err	0.0251	0.0191	0.0133	0.0183	0.0147	0.0183	0.0149	0.02	0.018		0.023	0.0223		0.0197	0.0218		0.0223		0.0186	0.0256	0.0202		0.0215	0.0193	0.0251		0.0188	0.0186	0.0166	0.0196			0.0238	0.0217	0.0189	0.0213	0.0258	0.0217	0.0256	0.0248			0.0244	0.0231		0.0234	0.0265	0.0268
Pb	0.0006	0.0008	0.0013	0.0009	0.001	0.0011	0.0012	0.001	0.0006	0.0011	0.0006	0.0011	0.001	0.001	0.0012	0.001	0.0009	0.0011	0.0008	0.0006	0.0009	0.001	0.0008	0.0014	0.0011	0.0023	0.0007	0.002	0.0014	0.0013	0.0016	0.0013	0.001	0.0014	0.0022	0.0013	0.0012	0.0017	0.0015	0.0011	0.0009	0.0012	0.0011	0.0009	0.0016	0.0014	0.0012	0.0015	0.0015
Pb Err	0.0001	0.0001	0.0001	0.0001	0.0001	0.0001	0.0001	0.0001	0.0001	0.0001	0.0001	0.0001	0.0001	0.0001	0.0001	0.0001	0.0001	0.0001	0.0001	0.0001	0.0001	0.0001	0.0001	0.0001	0.0001	0.0002	0.0001	0.0002	0.0001	0.0001	0.0002	0.0001	0.0001	0.0002	0.0002	0.0001	0.0001	0.0001	0.0001	0.0001	0.0001	0.0001	0.0001	0.0001	0.0001	0.0001	0.0001	0.0001	0.0001
Th	0.0002	0.0003	0.0003	0.0002	0.0003	0.0003	0.0003	0.0003	0.0002	0.0003	0.0001	0.0003	0.0002	0.0003	0.0003	0.0003	0.0003	0.0002	0.0003	0.0004	0.0003	0.0003	0.0003	0.0008	0.0003	0.0003	0.0003	0.0003	0.0005	0.0004	0.0003	0.0003	0.0005	0.0003	0.0003	0.0003	0.0004	0.0016	0.0014	0.0013	0.0015	0.0018	0.0014	0.0016	0.0014	0.0016	0.0018	0.0016	0.0017
Th Err	0	0	0	0	0	0	0	0	0	0	0	0	0	0	0	0	0	0	0	0	0	0	0	0	0	0	0	0	0	0	0	0	0	0	0	0	0	0.0001	0.0001	0.0001	0.0001	0.0001	0.0001	0.0001	0.0001	0.0001	0.0001	0.0001	0.0001
U	0.0003	0.0018	0.0004	0.0004	0.0012		0.0009	0.0011	0.0008	0.0017	0.0003	0.0015	0.0005	0.0038	0.0027	0.0009	0.0003	0.0014	0.0006	0.002	0.0006	0.0006	0.0013		0.0004	0.0011		0.0009		0.0003	0.0008	0.0002		0.0009	0.0008	0.0006	0.0003	0.0002		0.0008	0.0013	0.0005	0.0001	0.0009	0.0003	0.0003			0.0001
U Err	0.0001	0.0001	0.0001	0.0001	0.0001		0.0001	0.0001	0.0001	0.0001	0.0001	0.0001	0.0001	0	0.0001	0.0001	0.0002	0.0001	0.0001	0.0001	0.0001	0.0001	0.0001		0.0001	0.0001		0.0001		0.0002	0.0001	0.0002		0.0001	0.0001	0.0001	0.0002	0.0001		0.0001	0.0001	0.0001	0.0001	0.0001	0.0001	0.0001			0.0001
[truncated: 27 more columns]
